# Supplementary material for: Constitutive Optimized Production of Streptokinase inSaccharomyces cerevisiaeUtilizing Glyceraldehyde 3-Phosphate Dehydrogenase Promoter ofPichia pastoris
Source: Hindawi journal article supplement (doi:10.1155/2013/268249), 2013-01-01
Supplement: f1 [file 268249.f1.pdf]

**Table S1: Two level Plackett-Burman design table for the screening of carbon sources. +1 is for higher concentration and -1 for lower concentration.**

| <i>Variable codes</i> | <b>A</b>        | <b>B</b>       | <b>C</b>        | <b>D</b>       | <b>E</b>         | <b>F</b>       | <b>G</b>        |
|-----------------------|-----------------|----------------|-----------------|----------------|------------------|----------------|-----------------|
| <i>Carbon sources</i> | <b>Dextrose</b> | <b>Sucrose</b> | <b>Fructose</b> | <b>Maltose</b> | <b>Galactose</b> | <b>Lactose</b> | <b>Glycerol</b> |
| <b>1</b>              | +1              | +1             | -1              | +1             | -1               | -1             | -1              |
| <b>2</b>              | -1              | +1             | -1              | -1             | +1               | -1             | +1              |
| <b>3</b>              | -1              | -1             | +1              | +1             | -1               | -1             | +1              |
| <b>4</b>              | -1              | +1             | +1              | -1             | -1               | +1             | -1              |
| <b>5</b>              | +1              | +1             | +1              | +1             | +1               | +1             | +1              |
| <b>6</b>              | +1              | -1             | +1              | -1             | +1               | -1             | -1              |
| <b>7</b>              | +1              | -1             | -1              | -1             | -1               | +1             | +1              |
| <b>8</b>              | -1              | -1             | -1              | +1             | +1               | +1             | -1              |

**Table S2: Two level Plackett-Burman design table for the screening of organic nitrogen sources. +1 is for higher concentration and -1 for lower concentration.**

| <i>Variable codes</i>           | <b>A</b>       | <b>B</b>             | <b>C</b>        | <b>D</b>              | <b>E</b>            | <b>F</b>                 | <b>G</b>           |
|---------------------------------|----------------|----------------------|-----------------|-----------------------|---------------------|--------------------------|--------------------|
| <i>Organic Nitrogen sources</i> | <b>Peptone</b> | <b>Yeast extract</b> | <b>Tryptone</b> | <b>Casamino acids</b> | <b>Beef extract</b> | <b>Corn steep liquor</b> | <b>Polypeptone</b> |
| <b>1</b>                        | +1             | +1                   | -1              | +1                    | -1                  | -1                       | -1                 |
| <b>2</b>                        | -1             | +1                   | -1              | -1                    | +1                  | -1                       | +1                 |
| <b>3</b>                        | -1             | -1                   | +1              | +1                    | -1                  | -1                       | +1                 |

|          |    |    |    |    |    |    |    |
|----------|----|----|----|----|----|----|----|
| <b>4</b> | -1 | +1 | +1 | -1 | -1 | +1 | -1 |
| <b>5</b> | +1 | +1 | +1 | +1 | +1 | +1 | +1 |
| <b>6</b> | +1 | -1 | +1 | -1 | +1 | -1 | -1 |
| <b>7</b> | +1 | -1 | -1 | -1 | -1 | +1 | +1 |
| <b>8</b> | -1 | -1 | -1 | +1 | +1 | +1 | -1 |

**Table S3: Range and Levels of the Variables in Coded Units for RSM Studies**

| Variables                  | -2  | -1  | 0   | 1   | 2   | $\Delta X$ |
|----------------------------|-----|-----|-----|-----|-----|------------|
| Yeast Extract, x1, % (w/v) | 1.6 | 2.1 | 2.6 | 3.1 | 3.6 | 0.5        |
| Dextrose, x3, % (w/v)      | 1.7 | 2.2 | 2.7 | 3.2 | 3.7 | 0.5        |
| pH, x4                     | 6.1 | 6.5 | 7.1 | 7.5 | 7.9 | 0.4        |
| Temperature, °C            | 26  | 28  | 30  | 32  | 34  | 2          |

\* $\Delta X$  step increment in the input variable values

**Table S4: Design of Experiments by Central Composite Design (CCD) for RSM Studies**

| Run number | x1 | x2 | x3 | x4 | Coefficients assessed by                     | SK production    | SK production     |
|------------|----|----|----|----|----------------------------------------------|------------------|-------------------|
|            |    |    |    |    |                                              | Measured (IU/ml) | Predicted (IU/ml) |
| 1          | -1 | -1 | -1 | -1 | Fractional factorial $2^4$ design (16 expts) | 1750             | 2249.79           |
| 2          | 1  | -1 | -1 | -1 |                                              | 2100             | 2071.25           |
| 3          | -1 | 1  | -1 | -1 |                                              | 1775             | 2068.33           |
| 4          | 1  | 1  | -1 | -1 |                                              | 1850             | 2166.04           |

---

|    |    |    |    |    |                  |      |         |
|----|----|----|----|----|------------------|------|---------|
| 5  | -1 | -1 | 1  | -1 |                  | 1320 | 1799.58 |
| 6  | 1  | -1 | 1  | -1 |                  | 1950 | 1872.29 |
| 7  | -1 | 1  | 1  | -1 |                  | 1850 | 1881.87 |
| 8  | 1  | 1  | 1  | -1 |                  | 2000 | 2230.83 |
| 9  | -1 | -1 | -1 | 1  |                  | 1450 | 1838.33 |
| 10 | 1  | -1 | -1 | 1  |                  | 1500 | 1848.54 |
| 11 | -1 | 1  | -1 | 1  |                  | 1750 | 1830.62 |
| 12 | 1  | 1  | -1 | 1  |                  | 1600 | 2117.08 |
| 13 | -1 | -1 | 1  | 1  |                  | 1750 | 1989.37 |
| 14 | 1  | -1 | 1  | 1  |                  | 2100 | 2250.83 |
| 15 | -1 | 1  | 1  | 1  |                  | 2150 | 2245.41 |
| 16 | 1  | 1  | 1  | 1  |                  | 2350 | 2783.12 |
| 17 | -2 | 0  | 0  | 0  |                  | 1750 | 1804.37 |
| 18 | 2  | 0  | 0  | 0  |                  | 2000 | 2163.54 |
| 19 | 0  | -2 | 0  | 0  |                  | 1550 | 1958.54 |
| 20 | 0  | 2  | 0  | 0  |                  | 1900 | 2309.37 |
| 21 | 0  | 0  | -2 | 0  |                  | 1950 | 1901.04 |
| 22 | 0  | 0  | 2  | 0  |                  | 1750 | 2116.87 |
| 23 | 0  | 0  | 0  | -2 |                  | 1900 | 2113.54 |
| 24 | 0  | 0  | 0  | 2  | 8 star points    | 1450 | 2254.37 |
| 25 | 0  | 0  | 0  | 0  |                  | 1950 | 1945.00 |
| 26 | 0  | 0  | 0  | 0  |                  | 1850 | 1945.00 |
| 27 | 0  | 0  | 0  | 0  |                  | 2020 | 1945.00 |
| 28 | 0  | 0  | 0  | 0  | 6 central points | 1950 | 1945.00 |

---

---

|    |   |   |   |   |      |         |
|----|---|---|---|---|------|---------|
| 29 | 0 | 0 | 0 | 0 | 1900 | 1945.00 |
| 30 | 0 | 0 | 0 | 0 | 2000 | 1945.00 |

---

**Table S5: Model Summary and Analysis of Variance (ANOVA) for the Quadratic Model**

| <b>Model estimates</b> | <b>Sum of Squares</b> | <b>Degrees of freedom</b> | <b>Mean Square</b> | <b>F value</b> | <b>Sig.</b> |
|------------------------|-----------------------|---------------------------|--------------------|----------------|-------------|
| Regression             | 1254548.750           | 14                        | 89610.625          | 4.764          | 0.002       |
| Residual               | 282135.417            | 15                        | 18809.028          |                |             |
| Total                  | 1536684.167           | 29                        |                    |                |             |

**R, 0.904; R<sup>2</sup>, 0.816; Adjusted R<sup>2</sup>, 0.645; Std. Error of the Estimate, 137.146; CV, 11.13%**

**Table S6: Model Coefficients Estimated By Multiple Linear Regressions (Significance of Regression Coefficients)**

| <b>Variables</b> | <b>Beta</b> | <b>Standard Error</b> | <b>t</b> | <b>p-value (Sig. at &lt;0.05)</b> |
|------------------|-------------|-----------------------|----------|-----------------------------------|
| (Constant)       | 1945.000    | 55.990                | 34.739   | 0.0002                            |
| x1               | 89.792      | 27.995                | 3.207    | 0.006                             |
| x2               | 87.708      | 27.995                | 3.133    | 0.007                             |
| x3               | 53.958      | 27.995                | 1.927    | 0.073                             |
| x4               | -35.208     | 27.995                | -1.258   | 0.228                             |
| x1x1             | -9.740      | 26.187                | -0.372   | 0.715                             |
| x1x2             | -69.063     | 34.287                | -2.014   | 0.062                             |
| x1x3             | 62.813      | 34.287                | 1.832    | 0.087                             |

---

|      |         |        |        |       |
|------|---------|--------|--------|-------|
| x1x4 | -47.188 | 34.287 | -1.376 | 0.189 |
| x2x2 | -47.240 | 26.187 | -1.804 | 0.091 |
| x2x3 | 65.938  | 34.287 | 1.923  | 0.074 |
| x2x4 | 43.438  | 34.287 | 1.267  | 0.225 |
| x3x3 | -15.990 | 26.187 | -0.611 | 0.551 |
| x3x4 | 150.313 | 34.287 | 4.384  | 0.001 |
| x4x4 | -59.740 | 26.187 | -2.281 | 0.038 |

---
